# Supplementary material
Source: publisher site journal article supplement (https://www.degruyter.com/publication/journal_key/HFSG/downloadAsset/HFSG_Instructions%20for%20Authors_HF.pdf)
Supplement: Supplementary file 1 [file HFSG_Instructions%20for%20Authors_HF.pdf]

# Holzforschung/ Wood Research and Technology

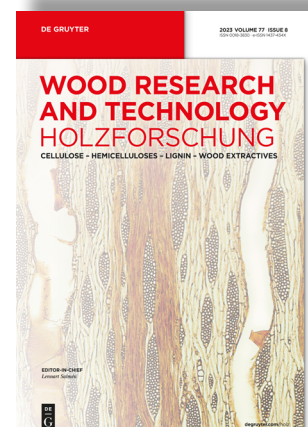

## Table of Content

|                                                                  |   |
|------------------------------------------------------------------|---|
| <b>Scope and general policies of the journal</b> .....           | 2 |
| Article (manuscript) categories .....                            | 2 |
| <b>Peer review, turnaround times and preprint policies</b> ..... | 2 |
| Peer review information .....                                    | 2 |
| Turnaround time .....                                            | 2 |
| Issue based publication .....                                    | 2 |
| Appeals.....                                                     | 2 |
| Preprint policy.....                                             | 2 |
| Inclusive language policy.....                                   | 2 |
| <b>Submission of manuscripts</b> .....                           | 3 |
| ORCID .....                                                      | 3 |
| Submission declaration and verification .....                    | 3 |
| Scientific misconduct .....                                      | 3 |
| Research integrity .....                                         | 3 |
| <b>Post-acceptance</b> .....                                     | 4 |
| Galley proofs.....                                               | 4 |
| Offprints.....                                                   | 4 |
| Repository policy .....                                          | 4 |
| Subscription-based and hybrid journals.....                      | 4 |
| Note for authors of NIH-funded research.....                     | 4 |
| Copyright .....                                                  | 4 |
| Open Access in hybrid journals.....                              | 4 |
| Article Processing Charges (APCs).....                           | 5 |
| <b>Ethical conduct of research</b> .....                         | 5 |
| Acknowledgments .....                                            | 5 |
| Research ethics.....                                             | 5 |
| Author contributions.....                                        | 5 |
| Competing interests .....                                        | 5 |
| Research funding.....                                            | 6 |
| Data availability.....                                           | 6 |
| Deposits.....                                                    | 6 |
| <b>Preparation of manuscripts</b> .....                          | 6 |
| Language .....                                                   | 6 |
| General format and manuscript elements.....                      | 6 |
| Title page information.....                                      | 7 |
| Abstract.....                                                    | 7 |
| Keywords.....                                                    | 7 |
| Sections .....                                                   | 7 |
| References.....                                                  | 8 |
| Figures and figure captions .....                                | 8 |
| Tables and table captions .....                                  | 8 |
| Abbreviations.....                                               | 8 |
| Equations and symbols.....                                       | 8 |
| Scientific names and non-abbreviated Latin expressions.....      | 8 |
| Nomenclature.....                                                | 9 |
| Units .....                                                      | 9 |
| Manufacturer details .....                                       | 9 |
| Audio and Video .....                                            | 9 |
| Appendices.....                                                  | 9 |
| Supplementary material .....                                     | 9 |

## Scope and general policies of the journal

*Holzforschung/Wood Research and Technology* is a peer-reviewed journal that publishes cutting-edge research on the biology, chemistry, physics and technology of wood and wood components as well as high quality papers on biotechnology and tree genetics.

### Article (manuscript) categories

- Original Article
- Mini Review
- Review
- Short Note

## Peer review, turnaround times and preprint policies

### Peer review information

*Holzforschung/Wood Research and Technology* is a single-blind journal. Manuscripts are reviewed anonymously by at least two independent reviewers selected by the Editor(s). Authors must provide the names, institution, country and e-mail addresses of up to three potential reviewers from at least two different countries. Authors may provide names of reviewers they wish to exclude from reviewing their manuscripts.

The Editor(s) reserve the right to reject submitted manuscripts without peer review if the studies are not novel or important enough to merit publication in the journal. Manuscripts deemed unsuitable (insufficient originality or limited interest to the target audience) will be also rejected without review.

### Turnaround time

*Holzforschung/Wood Research and Technology* aspires to inform authors of the peer review decision within 3–4 weeks from submission date. Revised manuscripts should be returned within 4–8 weeks. Accepted articles will be published online within 2–4 weeks of acceptance.

### Issue based publication

Articles are first published online as DOI citable articles and are later assigned to an issue with final page numbers.

### Appeals

Manuscripts that have been rejected for publication will be reconsidered only at the discretion of the Editor(s). Authors wishing to request reconsideration of a previously rejected manuscript must do so in written form and submit a rebuttal by e-mail to the journal's Editorial office. Authors should provide detailed reasons why they believe the manuscript should be reconsidered. If the rebuttal is accepted, the author will be asked to re-submit the manuscript, or the original decision will be reversed.

### Preprint policy

De Gruyter does not consider the following purposes of a paper as pre-publication: publication in the form of a congress abstract, publication as an academic thesis, publication as an electronic preprint on recognized servers such as arXiv, RePEc, bioRxiv, ResearchSquare, etc.

### Inclusive language policy

Inclusive language recognizes diversity, conveys respect for all people, is sensitive to differences and promotes equal opportunities. Content should not make assumptions about readers' beliefs or commitments; should not contain anything that might suggest that one person is superior to another because of age, gender, race, ethnicity, culture, sexual orientation, disability or health condition; and should use inclusive language throughout. Authors should ensure that their writing is free from prejudice, stereotypes, slang, references to the dominant culture and/or cultural assumptions.

We advise the following approach: Aim for gender neutrality by using plural nouns (clinicians, clients, participants) as standard and avoiding “he” or “she”, wherever possible. Instead, please use “they”. We recommend avoiding the use of descriptors that refer to personal characteristics such as age, gender, race, ethnicity, culture, sexual orientation, disability or health status unless they are relevant and valid.

## Submission of manuscripts

- Submit manuscripts exclusively online at: <https://mc.manuscriptcentral.com/holz>

We strongly recommend the authors register with institutional e-mail addresses, and refrain from using private e-mail addresses. A cover letter must be submitted for each manuscript upon first submission. It should contain a brief statement by the authors as to the element of novelty upon which they base their request for publication in *Holzforschung/Wood Research and Technology*.

Revised manuscripts must be accompanied by a point-to-point reply to all criticisms issued by reviewers and/or Editor(s). Major changes in the revised manuscript must be highlighted, preferably in track changes mode. A second, clean version must accompany the marked-up version.

## ORCID

The ORCID (Open Researcher and Contributor ID) is a non-profit, publisher-independent system that is used to uniquely identify academics and their publications. Click [here](#) for detailed information about ORCID. Submitting authors can login with username and password. If the journal uses ScholarOne as submission tool, authors can also login with their ORCID number. Providing an ORCID number for each author is strongly recommended. ORCID numbers (URL) should be listed on the manuscript title page.

## Submission declaration and verification

For information on plagiarism, please refer to [COPE – Committee of Publication Ethics](#). Submission of a manuscript to a journal implies that the work described has not been published previously, except in the form of an abstract, academic thesis, lecture, or preprint; that it is not under consideration for publication elsewhere (multiple, redundant, concurrent publication); that publication of the work is approved by all authors and tacitly or explicitly by the responsible authorities where the work was carried out; and that, if accepted for publication, it will not be published elsewhere, no matter in which language, without the written consent of the publisher. Exceptions are listed in the above section Preprint policy.

To exclude potential overlap with prior publication(s), your manuscript may be checked by the plagiarism checker Crossref Similarity Check ([iThenticate](#)). Previously published material must be referenced appropriately in the manuscript, regardless of whether the material was previously published in a subscription based, hybrid or open access journal, or in another language.

## Scientific misconduct

Only articles that have not been or will not be published elsewhere will be published in the journal, excluding articles that fall under De Gruyter's [Repository Policy](#). Multiple submissions/publications or redundant publications (i.e., republication of data already published by the same authors) will be rejected. If identified after publication, the journal reserves the right to publish a retraction note. In any case, Editor(s) will follow COPE's Code of Conduct and implement its advice.

## Research integrity

The authors are responsible for all aspects of the study and will ensure that any questions regarding the accuracy and integrity of any part of the work are adequately investigated and resolved.

With submitting your manuscript to *Holzforschung/Wood Research and Technology* the authors declare that they are the sole and intellectual authors of the manuscript. We do not accept papers that are generated by Artificial Intelligence (AI) or Machine Learning Tools primarily because such tools cannot take responsibility for the submitted work and therefore cannot be considered as authors. Where such tools or technologies are used as part of the design or methodology of a research study, their use should be clearly described in the Acknowledgments section. In case of doubt, the Editor(s) reserve the right to ask the authors to submit the raw experimental data.

## Post-acceptance

### Galley proofs

The corresponding author of an article receives the galley proofs in electronic form to check them for editing and typesetting accuracy. Corresponding authors receive an e-mail notification (“Check your proof”) with a link to the online proofreading system (Proof Central) through which they can access their galley proofs. The interface is similar to MS Word: authors can edit the text by entering their corrections directly, adding comments, and answering questions from the copy editor. If preferred, authors can also annotate and upload edits to the PDF version.

All instructions for proof corrections, including deadlines, will be given in the e-mail notification to the corresponding author, along with a user guide, providing step-by-step instructions for inserting corrections.

Substantial changes to an article accepted for publication will only be considered with the permission of the Editor(s) or after additional peer review. The responsibility for proofreading lies solely with the authors. **According to De Gruyter policy, once an article has been accepted, no changes to the author list and article title are allowed (except typos). The De Gruyter production team is instructed to enforce this policy during the production/proof correction process.**

### Offprints

Electronic files of typeset articles in Adobe Acrobat PDF format are provided free of charge. The corresponding author will receive an e-mail notification when the article has been published online along with instructions on how to access the article.

### Repository policy

Policies for sharing published journal articles differ for subscription-based and open access articles.

#### Subscription-based and hybrid journals

Authors may publish their articles in a public repository after an embargo period of 12 months (see De Gruyter’s [Sharing Policy](#)). Only the accepted author version of the manuscript, not the PDF version of the published article, can be published:

Immediately

- via their non-commercial personal website, blog or social media channels
- by updating a preprint in arXiv, RePEc, bioRxiv, ResearchSquare, etc. with the version of the accepted manuscript
- as a closed deposit via their research institute or institutional repository for internal institutional purposes or as part of an invitation-only research collaboration workgroup
- directly by providing copies to their students or to research collaborators for their personal use
- for private scholarly sharing as part of an invitation-only work group

After an embargo period

- as open deposits to institutional or subject repositories
- to scholarly collaboration networks (SCNs).

#### Note for authors of NIH-funded research

De Gruyter acknowledges that the author of a US-agency-funded article retains the right to provide a copy of the final manuscript to agency upon acceptance for publication or thereafter, for public archiving in PubMed Central 12 months after publication in *Holzforschung/Wood Research and Technology*. Note that only the accepted author’s version of the manuscript, not the PDF file of the published article, can be used for NIH archiving.

### Copyright

Manuscripts submitted to subscription and hybrid journals are accepted on condition of transfer of copyright ([License to Publish](#)) (for U.S. government employees: to the extent transferable) to the publisher. Once the manuscript has been accepted, it may not be published elsewhere without the consent of the copyright holders.

#### Open Access in hybrid journals

The author declares consent to place the article under the Creative Commons license CC-BY 4.0. In this case, the exclusive rights previously granted to the publisher will be converted into non-exclusive rights. The author confirms that they have already acquired all necessary rights for all components of the work in the event of an open access publication. For more information, refer to paragraph 5 in the [License to Publish](#).

## Article Processing Charges (APCs)

Authors publishing in **hybrid journals** do not have to pay APCs if they do not wish to publish their article open access. After acceptance and before production of an article, authors can decide whether to publish their article open access. Only if they decide to publish open access, APCs will be charged. All articles are peer-reviewed and accepted for publication based on the quality of their scientific contribution. The decision to publish open access does not affect the peer review process or the acceptance of the article. De Gruyter has [institutional agreements](#) in place that allow authors to publish open access articles at no cost at all – or with a significant discount. For more information on De Gruyter's open access policy, please read our [Open Access Policies](#).

## Ethical conduct of research

**Manuscripts must follow certain ethical guidelines** to be considered for publication. These can generally be found in the [Publication Ethics and Malpractice Statement](#). Accordingly, before submitting your manuscript, please make sure that you and your co-authors agree to the applicable requirements. For example, this may involve declaring and ruling out conflicts of interest or proving compliance with legal requirements related to human and animal testing. Furthermore, our [Code of Conduct for Publication Procedures and Ethics](#) defines the responsibility of De Gruyter as a publisher and the Editor(s) we work with, to ensure the legitimacy and quality of our published research. Our principles are based on the guidelines of the [Committee on Publication Ethics \(COPE\)](#).

Together with their submission, authors are required to fill in and upload a [Template for Ethical and Legal Declarations](#). Make sure that the information in the manuscript matches the information in the Template.

## Acknowledgments

Authors may wish to acknowledge individuals, working groups, institutions, etc. who provided help and support (other than financial) during research and the preparation of the manuscript (e.g., language checking, writing assistance or proof reading of the article, etc.). Individuals acknowledged must not be included on the title page, as a footnote to the title or otherwise. Make sure that the information in the manuscript matches the information in the [Template for Ethical and Legal Declarations](#).

## Research ethics

Authors are required to always comment on Research ethics. If a study did not require ethical approval, a corresponding statement *Not applicable* should be given. Make sure that the information in the manuscript matches the information in the [Template for Ethical and Legal Declarations](#).

## Author contributions

In view of research integrity, authorship is generally confined to an individual who has made a substantial intellectual or practical contribution to the conception or design of the project or the acquisition, analysis, or interpretation of data for the work of a publication and/or has drafted the work or reviewed/revised it critically for important intellectual content. The individual(s) listed as author(s) must agree to be accountable for said contribution and approve of the final version. **Honorary authorship is not allowed.**

Individuals who helped or participated in certain substantive aspects of the project or work (e.g., technical services staff), but whose contributions were not of sufficient extent to be listed as co-authors, should be appropriately acknowledged, usually in an Acknowledgements section.

Authors must explicitly declare their responsibility for the entire content of the manuscript and approval of its submission; individual contributions of each author may be added. Make sure that the information in the manuscript matches the information in the [Template for Ethical and Legal Declarations](#).

## Competing interests

A conflict of interest for a particular manuscript exists when a participant in the peer review and publication process – author, reviewer, and Editor – has ties to activities that could inappropriately influence his or her judgment, regardless of whether the judgment is actually affected. Financial relationships with industry (for example, employment, consultancies, stock ownership, honoraria, patent applications, expert testimony, grants and other



funding), either directly or through immediate family, are usually considered the most important conflicts of interest. However, conflicts can occur for other reasons, such as financial support of the study, ties to health insurance, politics or other stakeholders, personal relationships, academic competition, and intellectual passion. To ensure fair and objective decision-making, authors must declare any associations that pose a conflict of interest (financial, personal or professional) in connection with the manuscript under evaluation.

If no competing interests apply, please insert *The authors state no conflict of interest*. Make sure that the information in the manuscript matches the information in the [Template for Ethical and Legal Declarations](#).

### Research funding

If the study benefitted from funding through an unrestricted grant or other resources provided to a university, college, other research institution, or an individual author, state the name of the institute or organization that provided the funding along with the grant number, if applicable. Make sure that the information in the manuscript matches the information in the [Template for Ethical and Legal Declarations](#). If no funding was provided for the research, authors should state this fact. Otherwise, the default statement *None declared* will be set in place.

### Data availability

*Holzforschung/Wood Research and Technology* requires authors to follow our [Data Sharing Policy](#), which must comply with the European GDPR (*General Data Protection Regulation*) rules. Research data should be made widely available to the research community to demonstrate the robustness and validity of the research presented in the journal, to enable and encourage replication of the results, and to allow the community with opportunities to learn.

By publishing in the journal, authors are required to provide a data availability statement (DAS) in their articles. The DAS confirms the presence or absence of shared data. The DAS should include information on where the data supporting the findings reported in the article can be found, including, if applicable, hyperlinks to publicly archived datasets analyzed or generated during the study. If research data are not publicly available, this must be stated in the manuscript, as well as the conditions for accessing the data.

Authors are encouraged to share their data but are not required to do so. The decision to publish will not be affected by whether or not authors share their research data. Make sure that the information in the manuscript matches the information in the [Template for Ethical and Legal Declarations](#).

### Deposits

Each voucher specimen described or mentioned must have been deposited in an appropriate institution and bear a catalogue number. DNA sequences associated with the article must be deposited in molecular data banks. If possible, original data used in the manuscript may be deposited in an appropriate repository in a free access format.

## Preparation of manuscripts

### Language

All manuscripts must be written in clear and concise English. Please use either British or American English consistently. If you have reasons to doubt your proficiency with respect to spelling, grammar, etc. (e.g., because English is not your native language), then you may wish to employ – at your expense – the services of a professional language editor. A language proof may be requested by the Editor(s) as part of the revision process.

### General format and manuscript elements

*All article categories*: Set up the manuscript with line numbers. Figures must be integrated in the main text file (close to where they are cited) as well as uploaded separately as graphical source files.

*Original Articles*: Authors must present an accurate description of the research conducted and an objective discussion. The title should clearly identify the subject of the reported work. Maximum length: 8,000 words (authors need to pls. list the word count on the title page); maximum total of tables/figures/schemes: 15.

*Short Notes* (but no provisional or intermediate reports): They are reserved for clear-cut research results. Maximum length: 2,500 words (authors need to pls. list the word count on the title page); maximum total of tables/figures/schemes: 3.

*Mini Reviews and Reviews:* They may be of a theoretical, experimental or practical nature, provided that they transmit essential aspects of the knowledge in the field. There is no length limit provided the topic is handled in an adequate way.

## Title page information

Please provide the following information on the first page of your manuscript during the submission process:

- Author names

Write at least one given and family name in full. For all other names, initial is sufficient. List authors in the order you want them to appear in the final version. Indicate the corresponding author by using an asterisk “\*” after the family name. Please note that as per De Gruyter policy, no author list changes are permitted after acceptance of a manuscript.

Author footnotes (superscript letters or numbers) to explain authorship details are not all allowed in the author line and will be converted to an author note on the first page. Kindly stick to the wording as in the examples below:

- [Full name author A] and [full name author B] contributed equally to this work.
- [Full name author A] and [full name author B] share senior authorship.
- [Full name author A] and [full name author B] share first authorship.

- Title and short title

Provide a descriptive, concise and comprehensible main title as well as an abbreviated form of the main title (short title) with no more than 75 characters (including spaces). The short title will be displayed at the top of each page of the final article version. The article title and (if applicable) subtitle should be in sentence case. Use lowercase letters after colon.

- Affiliations

For the corresponding author supply the following details: e-mail address, department, institution, street, city, postal code and country; for all other authors department, institution, city, postal code and country are mandatory. Please also provide all details concerning the current institutional affiliation in case you changed affiliation during the manuscript preparation and publication process.

Supplying an ORCID is highly recommended (for more information and registration, please visit the [ORCID](#) webpage).

## Abstract

Give a concise summary of your article in an abstract of up to 200 words (up to 100 for *Short Notes*) in a single paragraph. As abstracts are published separately by abstracting and indexing services, please spell out abbreviations at first use and do not include footnotes, tables, figures or equations. If it is essential to use a literature citation in the abstract, full bibliographic information must be given as per journal references style.

## Keywords

Keywords are a key tool used by abstracting and indexing services as well as search engines to facilitate finding your paper. These can be single words, but also short phrases representing the content. Supply 3–6 specific and concise keywords in lower case, separated by semicolon. Avoid abbreviations and the repetition of words already used in the article's title.

## Sections

*Original Articles and Short Notes:* Main sections should be in sentence case and numbered with Arabic numerals (1., 2., 3. etc.); lower-level sections should be assigned numbers as follows: 1.1, 2.1, 2.1.1 etc. Sections should be labeled with headings in a consistent format and with a clear hierarchy of section headings. For subdivided sections ensure that they have at least two subheadings on the same level. Text section order: title page, abstract, keywords, introduction, materials and methods, results, discussion, conclusion (optional), acknowledgements, declarations, references, tables and figure captions.

*Mini Reviews and Reviews:* Main sections should be in sentence case and numbered with Arabic numerals (as for *Original Articles*, see above). Text section order: title page, abstract, keywords, main text with factual headings, conclusion (optional), acknowledgements, references, declarations, tables and figure captions.

**References**

*Holzforschung/Wood Research and Technology* applies the Harvard style. Please adhere strictly to the reference style as outlined in the [Reference Style Sheet](#). The style sheet provides examples for different types of citations in the text as well as for different bibliographic items in the reference list. Please note: All references mentioned in the reference list must be mentioned in the text, and vice versa. Unpublished results and personal communications should be cited as such within the text (but not included in the references list).

**Figures and figure captions**

Graphs, line drawings, photographs, schemes, diagrams, etc. may be used to illustrate your findings. Publication of color figures is provided free of charge in both online and print editions. The publication quality always depends directly on the quality and size of the delivered data.

Please label the illustrations as "Figure". Each figure should be uploaded separately as .jpg, .eps, .png or .tiff file. Images should have a minimum resolution of 300 dpi (color or black-white pixel graphics/half-tone images) in the intended size (600 dpi combination of pixel graphic and line drawing, 1200 dpi for line drawings). When drawing bar graphs, use patterning/color instead of grey scales (faint shading may be lost upon reproduction). Figures should not display any frames.

Figures should be numbered consecutively using Arabic numerals (from 1) throughout the text. If you include multi-part figures, please make sure to label all part figures by using consistently uppercase letters (A, B, C, etc.) or lowercase letters (a, b, c, etc.). Please make sure that all figures are explicitly referred to in the text. Note that figures will usually be placed at the top or the bottom of the page in the final layout.

Each Figure incl. caption must be understandable stand-alone. Provide a concise and self-explanatory caption for each figure. In case of multi-part figures, please include a main caption as well as partial figure captions.

The key to the symbols depicted in the figures should be included in the figure itself, where possible. Otherwise, include it in the caption. The caption itself should not be included in the figure.

Please make sure that letters, numbers, symbols, text, etc. included in the figure are clear, easy to read (not below 6 pt, preferably in Arial or Helvetica) and uniform in style.

It is the authors' responsibility to use images that do not infringe on any copyrights, performing rights, trademark rights, personal rights or any other third-party rights or are otherwise unlawful. Copyright permissions can be obtained through the Copyright Clearance Center (<https://www.copyright.com/>).

**Tables and table captions**

Number tables consecutively using Arabic numerals. Tables should be provided in an editable source format (Word, LaTeX; Excel files should be avoided). Do not submit Tables as graphical source files.

Each Table incl. caption must be understandable stand-alone. Provide a short descriptive title, column heads, and (if necessary) footnotes to make each table self-explanatory. In column heads, separate units with a comma and use parentheses or square brackets for additional measures (e.g., %, range, etc.). Use footnotes in alphabetical order (a, b, c, etc.) to give emphasis or further information. Expand abbreviations used in tables in footnotes. In case bold type or italics are used to highlight information, please explain their meaning. Avoid color, shading, vertical lines, and other cell borders. Note that Tables will usually be placed at the top or the bottom of the page in the final layout.

**Abbreviations**

The use of abbreviations and acronyms is permitted given that they are expanded in full when used the first time with the abbreviation in parentheses (applies to abstract and main text). Please use them consistently thereafter. A list of non-standard abbreviations should be included if there are more than 10.

**Equations and symbols**

Equations should be well-aligned and not crowded. Use only Latin and Greek alphabets. Avoid complicated superscripts and subscripts by introducing new symbols. Avoid repetition of a complicated expression by representing it with a symbol. For MS Word submissions create equations using the Microsoft equation editor or a corresponding add-on. Do not submit math equations as images, but as editable text. Number displayed equations consecutively with Arabic numerals (if referred to in the text).

**Scientific names and non-abbreviated Latin expressions**

Gene acronyms, alleles, genus, species, and non-abbreviated Latin expressions should be written in italic font type. Capitalize the first letter of the genus, but not the species. Format all binomial names in italics. After the first use, genus names should be abbreviated to a first initial. For genus names starting with the same letter differentiate by including the second letter (or more, if needed for unambiguous differentiation). 'sp.', 'spp.', 'ssp.', 'var.', 'L.', 'subsp.', etc. should be Roman.



**Nomenclature**

Authors should consult the the ACS Style Guide for nomenclature and format guidelines. Chemical names, abbreviations and acronyms should be given in parentheses at the first appearance in the text. Inclusion of a nomenclatural list is recommended when many symbols are used in the manuscript. Well-known procedures/reactions should be designated by name, and appropriate literature references should be given.

**Units**

Use SI units consistently. For more information, please visit <https://www.bipm.org/en/home>

**Manufacturer details**

For all products used (such as reagents and apparatus), supply the manufacturer name, city, (state abbreviation, if applicable), country.

**Audio and Video**

For all examples connected to an audio/video recording, supply audio/video clips. Provide these clips as separate files and do not integrate them directly into the manuscript.

Name all your clips using the following convention: e.g., audio-1-smith.MP3, video-1-smith.MP4, [media]-[identifier]-[author-family-name].[extension]. Indicate the position in the article by placing a marker as follows: [associated audio-1-smith.wav with example (1)]. File naming: audiosupplement-1-smith.MP3, [media.supplement]-[identifier]-[author-family-name].[extension]. The following formats are preferred: audio files in MP3 (at least 16 bit) and video files in MP4 (at least a height of 480 pixels and a frame rate of 25). However, other common formats are also permitted. Provide a short caption for each media file and number them consecutively. Any other media files can be included as part of the Supplementary material.

**Appendices**

Use appendices for information that supports your findings but is not essential for the understanding of your paper (e.g., lengthy mathematical proofs, tables, graphics, etc.). Cite appendices within the main text. Tables and figures in the appendix should be numbered consecutively as follows: Figure A1, Table A1, Figure A2, Table A2, etc. The appendix is placed at the end of the main text before the references list.

**Supplementary material**

Supplementary material which may offer further information on your work but does not belong to the core part of the article, will not be part of the typeset article PDF. The material will be made available as a separate download in the online version of the article. Supplementary material may contain questionnaires for discussed surveys, protocols, code samples, datasets, extensive tables, additional figures, multimedia files (audio, video, animations), etc. If the manuscript is accepted, supplementary material will be referenced in the print version, but will be published online only.

Please provide supplementary material data as separate file(s) of no more than 10 MB per file during submission. Note that the material should be publication-ready (not in track-changes mode), as it will not be typeset, but published exactly as supplied. Within the text, the supplementary material must be cited consecutively and be referred to as supplementary material data (e.g., see Supplementary Figure S1, Supplementary Table S1, etc.).

**Please contact the Editorial Office for any further questions you may have:**

Tel. ++49-30-26005279

Email: [holzforschung.editorial@degruyter.com](mailto:holzforschung.editorial@degruyter.com)

<https://www.degruyter.com/holz>
